# Supplementary material for: Sea urchin-like microstructure pressure sensors with an ultra-broad range and high sensitivity
Source: PubMed Central journal article supplement (PMC7979929; doi:10.1038/s41467-021-21958-y), 2021-03-19
Supplement: 41467_2021_21958_MOESM1_ESM.pdf [file 41467_2021_21958_MOESM1_ESM.pdf]

# Sea urchin-like microstructures pressure sensors with an ultra-broad range and high sensitivity

Xiu-man Wang<sup>1</sup>, Lu-qi Tao<sup>2</sup>, Min Yuan<sup>1</sup>, Zeping Wang<sup>1</sup>, Jiabing Yu<sup>1</sup>, Dingli Xie<sup>1</sup>, Feng Luo<sup>1</sup>, Xianping Chen<sup>\*1,2</sup> & ChingPing Wong<sup>\*3</sup>

<sup>1</sup>Key Laboratory of Optoelectronic Technology & Systems, Education Ministry of China, Chongqing University and College of Optoelectronic Engineering, Chongqing University, Chongqing 400044, China

<sup>2</sup>State Key Laboratory of Power Transmission Equipment & System Security and New Technology and School of Electrical Engineering, Chongqing University, Chongqing 400044, China.

<sup>3</sup>School of Materials Science and Engineering, Georgia Institute of Technology

\*Corresponding author: [xianpingchen@cqu.edu.cn](mailto:xianpingchen@cqu.edu.cn) [cp.wong@mse.gatech.edu](mailto:cp.wong@mse.gatech.edu)

## Supplementary Figures

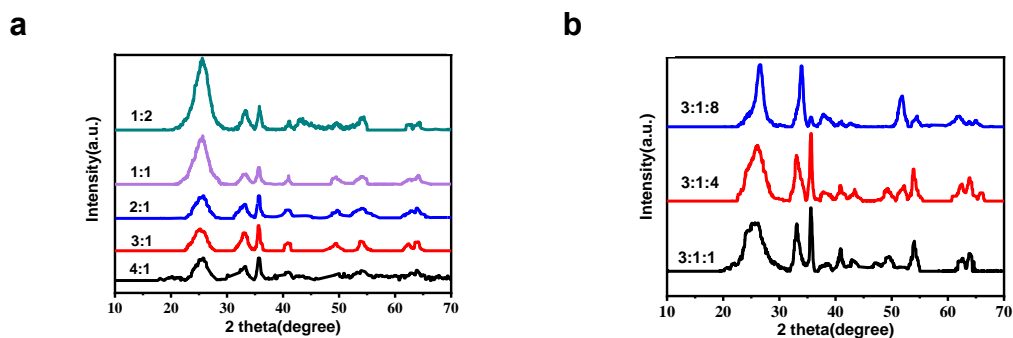

**Supplementary Figures 1.** XRD patterns. **a** the different mass ratios of Fe<sub>2</sub>O<sub>3</sub>/C (4:1,3:1,2:1,1:1,1:2), **b** the different mass ratios of Fe<sub>2</sub>O<sub>3</sub>/C@SnO<sub>2</sub>(3:1:1,3:1:4,3:1:8)

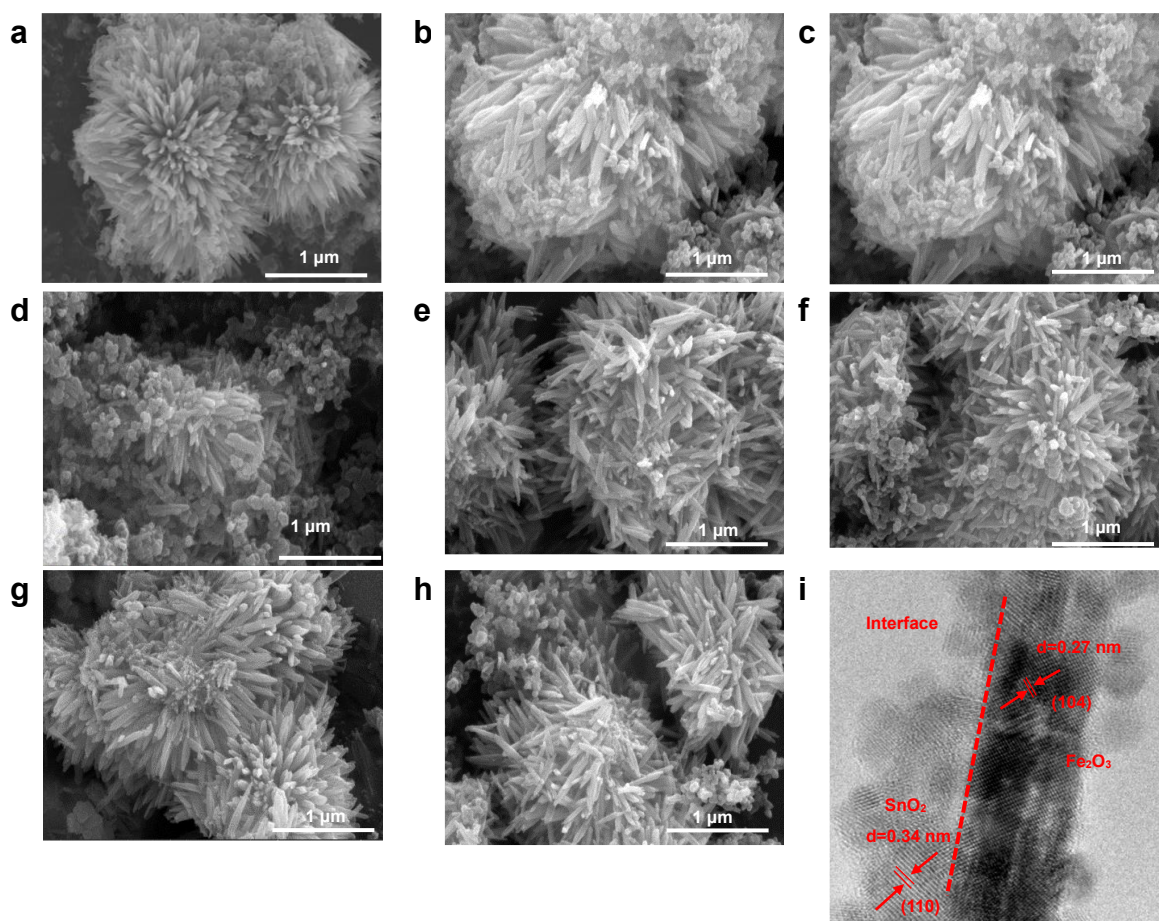

**Supplementary Figure 2.**  $\text{Fe}_2\text{O}_3/\text{C}$  and  $\text{Fe}_2\text{O}_3/\text{C}@\text{SnO}_2$  microparticle morphology. The SEM images of the different mass ratios of  $\text{Fe}_2\text{O}_3/\text{C}$  (**a** 4:1, **b** 2:1, **c** 1:1, **d** 1:2), the different mass ratios of  $\text{Fe}_2\text{O}_3/\text{C}@\text{SnO}_2$  (**e** 3:1:1, **f** 3:1:8, **g** 3:1:4), **g** and **h** the mass ratio of  $\text{Fe}_2\text{O}_3$ , C, and  $\text{SnO}_2$  3:1:4 after loading-unloading for 3500 cycles. **i**. High resolution TEM(HRTEM) images of the mass ratio of  $\text{Fe}_2\text{O}_3$ , C and  $\text{SnO}_2$  3:1:4.

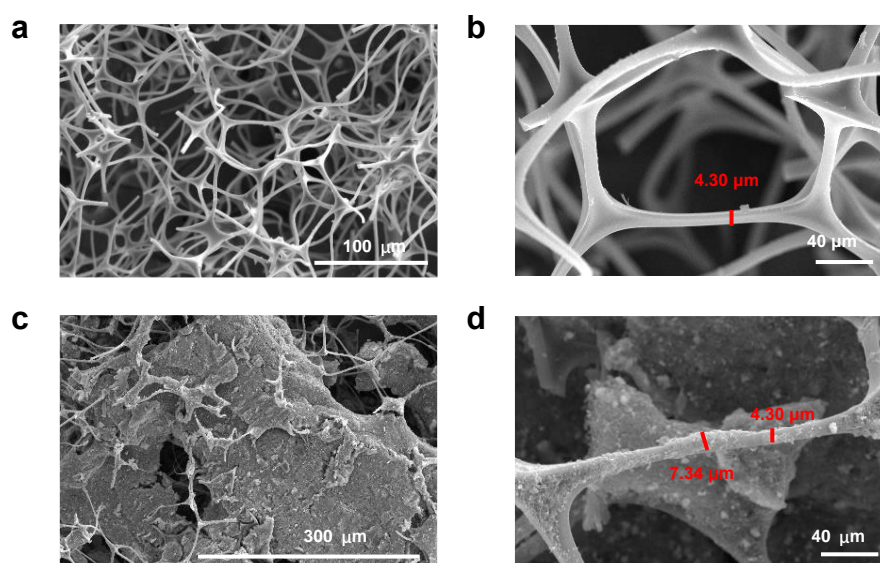

**Supplementary Figure 3.** SEM images. **a** and **b** SEM images of melamine sponge, **c** and **d** SEM images of  $\text{Fe}_2\text{O}_3/\text{C}@\text{SnO}_2/\text{melamine}$  sponge.

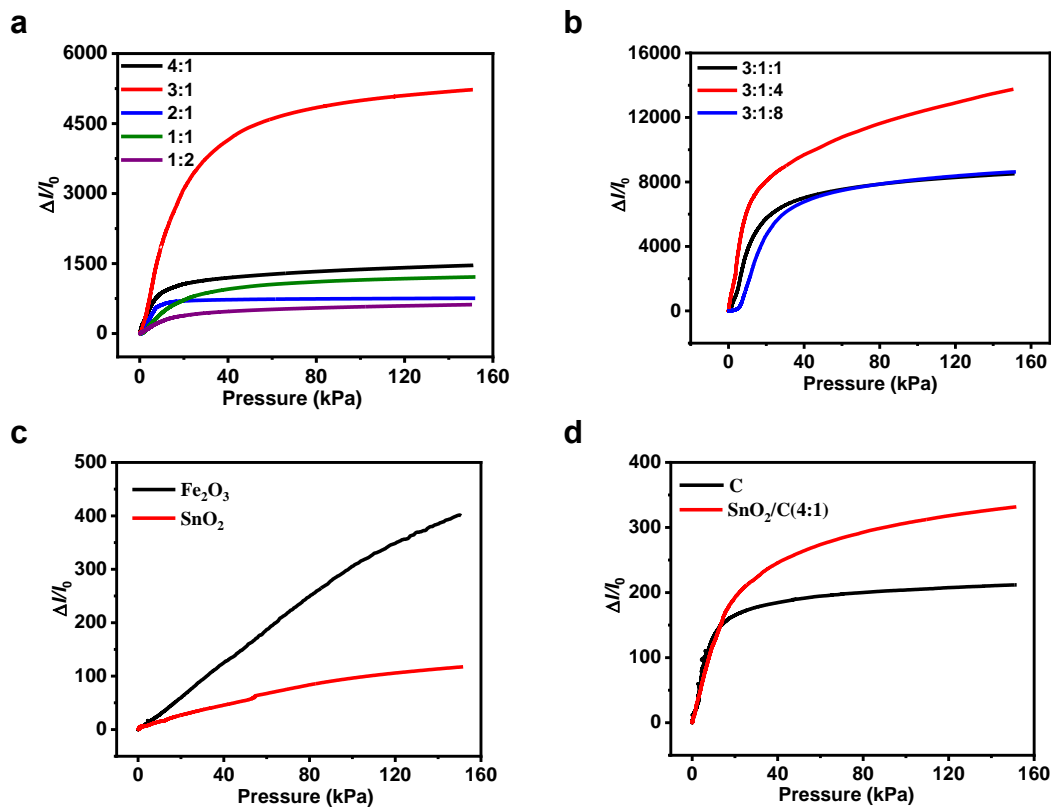

**Supplementary Figure 4.** Pressure-sensing characterizations. **a** Relative current change for the applied pressure, where the curves represent the different mass ratios of  $\text{Fe}_2\text{O}_3/\text{C}$  (4:1, 3:1, 2:1, 1:1 and 1:2), **b** The different mass ratios of  $\text{Fe}_2\text{O}_3/\text{C}@/\text{SnO}_2$  (3:1:1, 3:1:4 and 3:1:8), **c**  $\text{Fe}_2\text{O}_3$  and  $\text{SnO}_2$ , **d**  $\text{C}$  and the mass of  $\text{SnO}_2/\text{C}$  4:1.

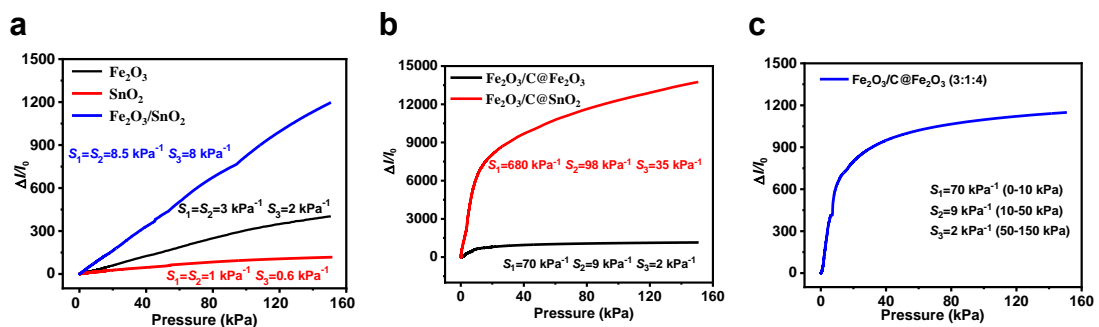

**Supplementary Figure 5.** Pressure-sensing characterizations. **a** The sensitivity of  $\text{Fe}_2\text{O}_3$ ,  $\text{SnO}_2$ , and  $\text{Fe}_2\text{O}_3/\text{SnO}_2$  pressure sensor. **b** The sensitivity of  $\text{Fe}_2\text{O}_3/\text{C}@/\text{Fe}_2\text{O}_3$  (3:1:4) and  $\text{Fe}_2\text{O}_3/\text{C}@/\text{SnO}_2$  (3:1:4) pressure sensor. **c** The sensitivity of  $\text{Fe}_2\text{O}_3/\text{C}@/\text{Fe}_2\text{O}_3$  with the mass ratio of 3:1:4 based sensors.

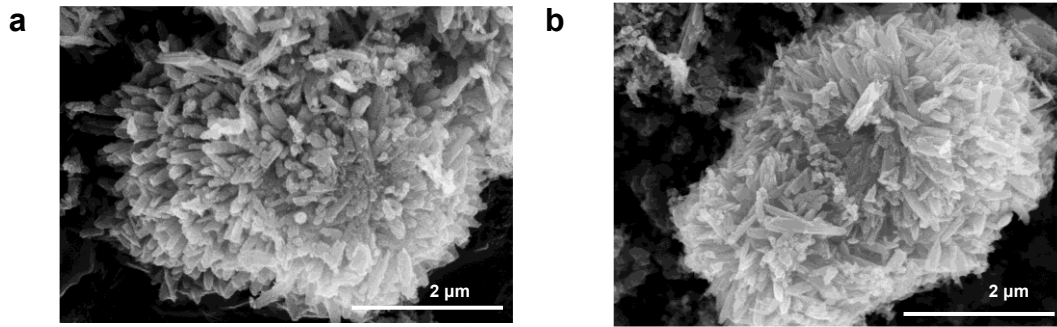

**Supplementary Figure 6.** SEM images of  $\text{Fe}_2\text{O}_3/\text{C}@ \text{Fe}_2\text{O}_3$  (3:1:4)

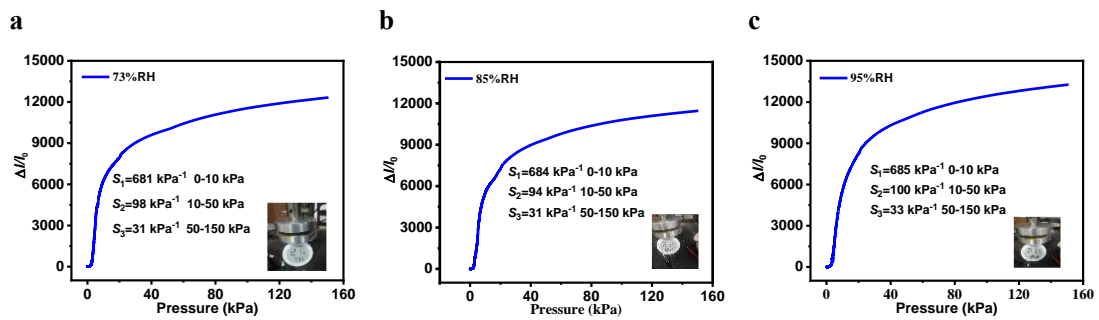

**Supplementary Figure 7.** Sensing performance under different relative humidity. Sensitivities of  $\text{Fe}_2\text{O}_3/\text{C}@ \text{SnO}_2$  (3:1:4) pressure sensor under the RH of **a** 73%, **b** 85% and **c** 95% at room temperature.

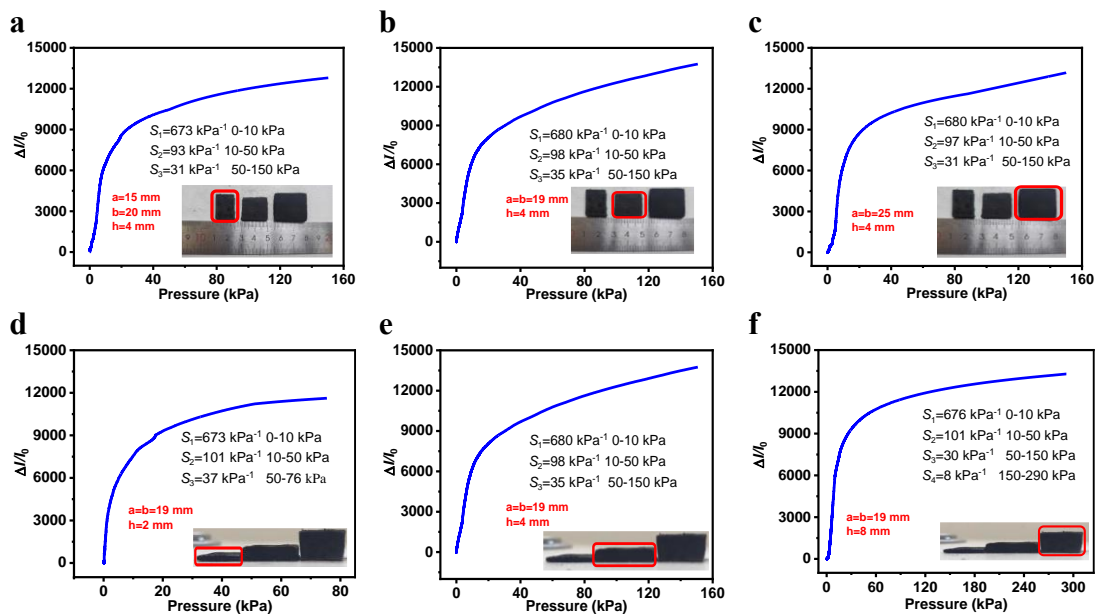

**Supplementary Figure 8.** Sensing performance under different areas and thickness. The current ratio variation with pressure of the  $\text{Fe}_2\text{O}_3/\text{C}@ \text{SnO}_2$ (3:1:4) sponge **a-c** with a sizes of 15×20 mm, 19×19 mm and 25×25 mm, **d-f** thickness of 2 mm, 4 mm and 8 mm, respectively.

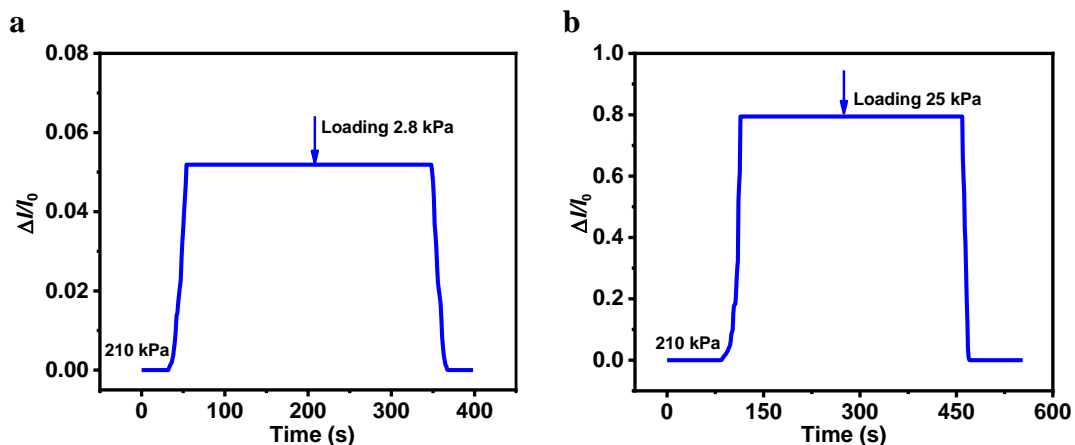

**Supplementary Figure 9.** Detection of micro pressure under loading pressures. **a** 2.8 kPa and **b** 50 kPa.

**Supplementary Table 1 Sensitivity summary of pressure sensor in this work**

| Materials                                              | Sensitivity( $\text{kPa}^{-1}$ )<br>(0-10 kPa) | Sensitivity ( $\text{kPa}^{-1}$ )<br>(10-50 kPa) | Sensitivity ( $\text{kPa}^{-1}$ )<br>(50-150 kPa) |
|--------------------------------------------------------|------------------------------------------------|--------------------------------------------------|---------------------------------------------------|
| $\text{Fe}_2\text{O}_3$                                | 3                                              | 3                                                | 2                                                 |
| $\text{SnO}_2$                                         | 1                                              | 1                                                | 0.60                                              |
| C                                                      | 15                                             | 0.88                                             | 0.20                                              |
| $\text{Fe}_2\text{O}_3/\text{C}$ (4:1)                 | 88                                             | 7                                                | 2.30                                              |
| $\text{Fe}_2\text{O}_3/\text{C}$ (3:1)                 | 203                                            | 44                                               | 6                                                 |
| $\text{Fe}_2\text{O}_3/\text{C}$ (2:1)                 | 76                                             | 9                                                | 3.90                                              |
| $\text{Fe}_2\text{O}_3/\text{C}$ (1:1)                 | 47                                             | 8                                                | 1.27                                              |
| $\text{Fe}_2\text{O}_3/\text{C}$ (1:2)                 | 28                                             | 3                                                | 1.02                                              |
| $\text{SnO}_2/\text{C}$ (4:1)                          | 13                                             | 2.4                                              | 0.7                                               |
| $\text{Fe}_2\text{O}_3/\text{C}@/\text{SnO}_2$ (3:1:1) | 420                                            | 80                                               | 12                                                |
| $\text{Fe}_2\text{O}_3/\text{C}@/\text{SnO}_2$ (3:1:4) | 680                                            | 98                                               | 35                                                |
| $\text{Fe}_2\text{O}_3/\text{C}@/\text{SnO}_2$ (3:1:8) | 314                                            | 65                                               | 11                                                |

**Supplementary Table 2 Sensitivity summary of pressure sensor in reference**

| Materials                                                   | Nanostructure    | Sensitivity ( $\text{kPa}^{-1}$ )                                 | Reference    |
|-------------------------------------------------------------|------------------|-------------------------------------------------------------------|--------------|
| ZnO/PDMS                                                    | Sea urchin-like  | 75 - 121 (0 - 200 Pa)                                             | 1            |
| Au/Ag/PU                                                    | Sea urchin-like  | 2.46 (0 - 1 kPa)<br>0.52 (1 -8.2 kPa)                             | 2            |
| C/PDMS                                                      | Sea urchin-like  | 263 at 1 Pa                                                       | 3            |
| Mxene/Reduced Graphene Oxide Aerogel                        | Naosheets        | 0.55 (23 - 982 Pa)<br>3.81 (982Pa - 10 kPa)<br>2.52 (10 - 30 kPa) | 4            |
| Carbon Black@Polyurethane Sponge                            | Nanosheets       | 0.068 (0-2 kPa)<br>0.023 (2-10 kPa)<br>0.036 (10-16 kPa)          | 5            |
| MXene/Sponge                                                | Nanosheets       | 147 (0-5 kPa)<br>442 (5-20 kPa)                                   | 6            |
| Graphene/Eco-flex                                           | Triode-mimicking | 4.68 (0-150 kPa)<br>11.09 (150-200 kPa)                           | 7            |
| CNT/cotton textile                                          | Nanowires        | 14.4 (0-3.5 kPa)<br>7 (3.5-15 kPa)                                | 8            |
| MXene/tissue paper                                          | Nanosheets       | 0.55 (0-3 kPa)<br>3.81 (3-10 kPa)                                 | 9            |
| $\text{Fe}_2\text{O}_3/\text{C}@\text{SnO}_2/\text{Sponge}$ | Sea urchin-like  | 680 (0-10 kPa)<br>98 (10-50 kPa)<br>35 (5-150 kPa)                | In this work |

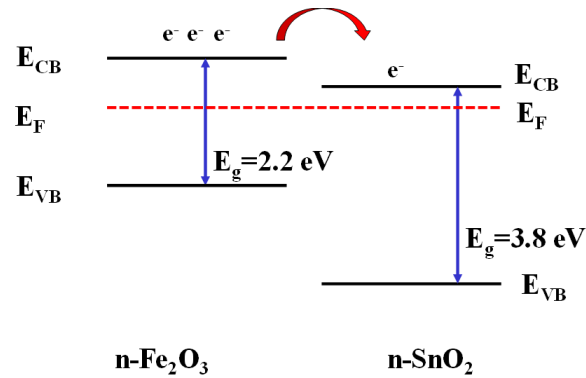

**Supplementary Figure 10.** Schematic illustration of formed  $\text{Fe}_2\text{O}_3\text{-SnO}_2$  n-n heterojunction.  $E_{\text{CB}}$ : conduction band edge energy,  $E_{\text{VB}}$ : valence band edge energy,  $E_{\text{gap}}$ : band gap energy,  $E_{\text{F}}$ : fermi energy.

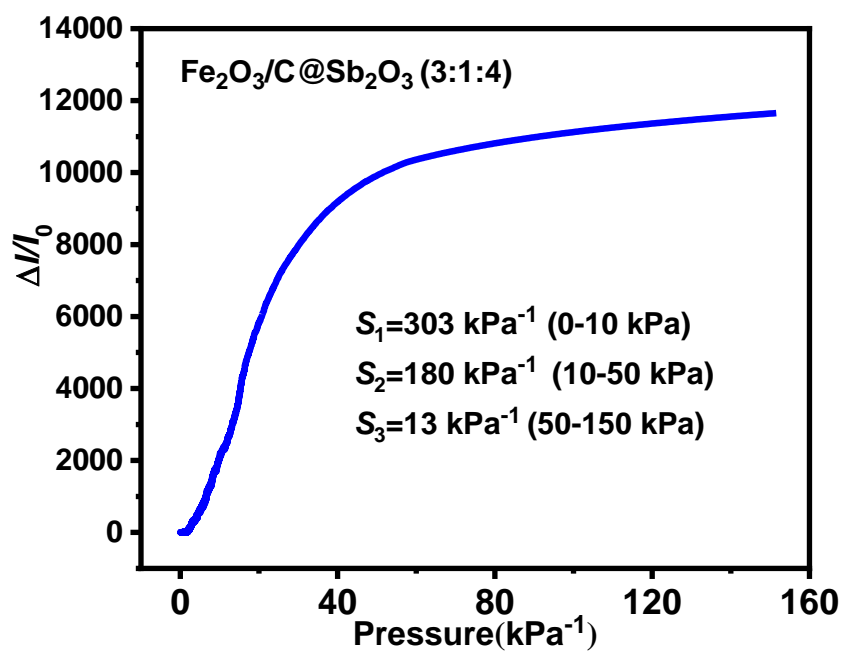

**Supplementary Figure 11.** Change of current with pressure increases for Fe<sub>2</sub>O<sub>3</sub>/C@Sb<sub>2</sub>O<sub>3</sub>.

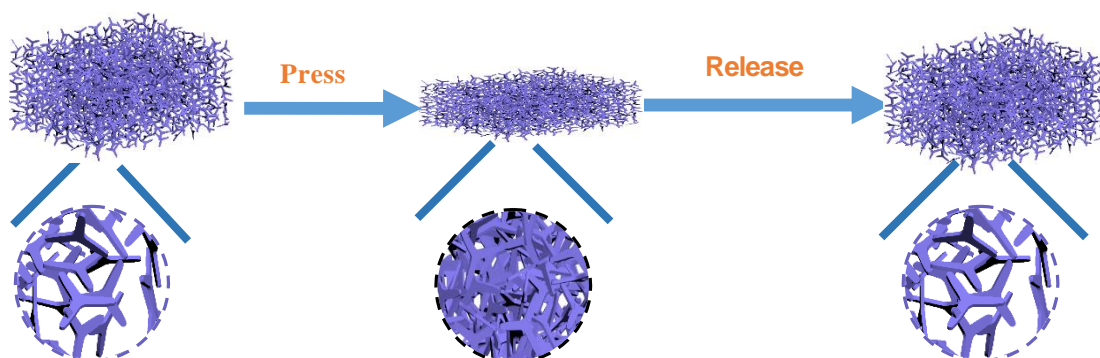

**Supplementary Figure 12.** The schematic pressure-sensing models of the sponge.

## Reference

1. Yin, B., Liu, X., Gao, H., Fu, T., & Yao, J. Bioinspired and bristled microparticles for ultrasensitive pressure and strain sensors. *Nat. Commun.* **9**, 1-8 (2018).
2. Lee, D. et al. Highly sensitive, transparent, and durable pressure sensors based on sea-urchin shaped metal nanoparticles. *Adv. Mater.* **28**, 9364-9369 (2016).
3. Shi, L. et al. Quantum effect-based flexible and transparent pressure sensors with ultrahigh sensitivity and sensing density. *Nat. Commun.* **11**,1-9 (2020).
4. Ma, Y. et al. 3D synergistical MXene/reduced graphen oxide aerogel for a piezoresistive sensor. *ACS Nano*, **12**, 3209-3216 (2018).
5. Wu, X. et al. Large-Area Compliant, Low-Cost, and Versatile Pressure-Sensing Platform Based on Microcrack-Designed Carbon Black@Polyurethane Sponge for Human-Machine Interfacing. *Adv. Funct. Mater.* **26**, 6246-6256 (2016).
6. Yang, Y. et al. 3D hybrid porous Mxene-sponge network and its application in piezoresistive sensor. *Nano Energy*. **50**, 79-87 (2018).
7. Wu, Q. et al. Triode-mimicking graphene pressure sensor with positive resistance variation for physiology and motion monitoring. *ACS Nano*. **14**, 10104-10110 (2020).
8. Liu, M. et al. Large-Area All-Textile Pressure Sensors for Monitoring Human Motion and Physiological Signals. *Adv. Mater.* **29**,701-709 (2017).
9. Ying, et al. A Wearable Transient Pressure Sensor Made with MXene Nanosheets for Sensitive Broad-Range Human-Machine Interfacing. *Nano lett.* **19**, 1143-1150 (2019).
